# Supplementary material for: Maternal Bacterial Engraftment in Multiple Body Sites of Cesarean Section Born Neonates after Vaginal Seeding—a Randomized Controlled Trial
Source: PubMed Central journal article supplement (PMC10294643; doi:10.1128/mbio.00491-23), 2023-04-19
Supplement: mbio.00491-23-s0001.pdf [file mbio.00491-23-s0001.pdf]

**Supplemental Table 1.** Baseline characteristics of randomized infants and mothers.

|                                                        | Seeded (n=10)     | Control (n=10)      |
|--------------------------------------------------------|-------------------|---------------------|
| <b>Infant characteristics</b>                          |                   |                     |
| Male infant gender                                     | 6 (60.0%)         | 6 (60.0%)           |
| Gestational age (weeks)                                | 38.5 [37.2, 39.0] | 39.0 [39.0, 39.0]   |
| Birth weight (kg)                                      | 3.1 [3.0, 3.2]    | 3.4 [3.1, 3.6]      |
| Infant antibiotics by 7 days                           | 0 (0%)            | 0 (0%)              |
| Infant antibiotics by 30 days                          | 0 (0%)            | 0 (0%) <sup>a</sup> |
| Method of first feed                                   |                   |                     |
| Breast                                                 | 8 (80%)           | 10 (100%)           |
| Formula                                                | 1 (10%)           | 0 (0%)              |
| Both                                                   | 1 (10%)           | 0 (0%)              |
| Infant feeding at 7 days                               |                   |                     |
| Breastmilk only (%)                                    | 5 (50%)           | 7 (70%)             |
| Formula and breastmilk (%)                             | 4 (40%)           | 3 (30%)             |
| Formula only (%)                                       | 1 (10%)           | 0 (0%)              |
| <b>Maternal characteristics</b>                        |                   |                     |
| Maternal age (years)                                   | 34.0 [32.0, 37.2] | 33.0 [30.5, 34.8]   |
| Maternal race                                          |                   |                     |
| White                                                  | 5 (50%)           | 9 (90%)             |
| Asian                                                  | 3 (30%)           | 1 (10%)             |
| Other                                                  | 1 (10%)           | 0 (0%)              |
| Declined to provide                                    | 1 (10%)           | 0 (0%)              |
| Maternal pre-pregnancy BMI (kg/m <sup>2</sup> )        | 24.3 [21.7, 28.0] | 26.6 [22.2, 29.7]   |
| Antibiotics during pregnancy                           | 3 (30%)           | 1 (10%)             |
| Gestational diabetes                                   | 1 (10%)           | 0 (0%)              |
| Antibiotics during gauze because of Penicillin allergy | 2 (20%)           | 0 (0%)              |

Data presented as median [IQR] or n (%). <sup>a</sup>2 infants missing this information
