# Supplementary material for: Maternal Bacterial Engraftment in Multiple Body Sites of Cesarean Section Born Neonates after Vaginal Seeding—a Randomized Controlled Trial
Source: PubMed Central journal article supplement (PMC10294643; doi:10.1128/mbio.00491-23), 2023-04-19

**A****Baby-Transitional Stool**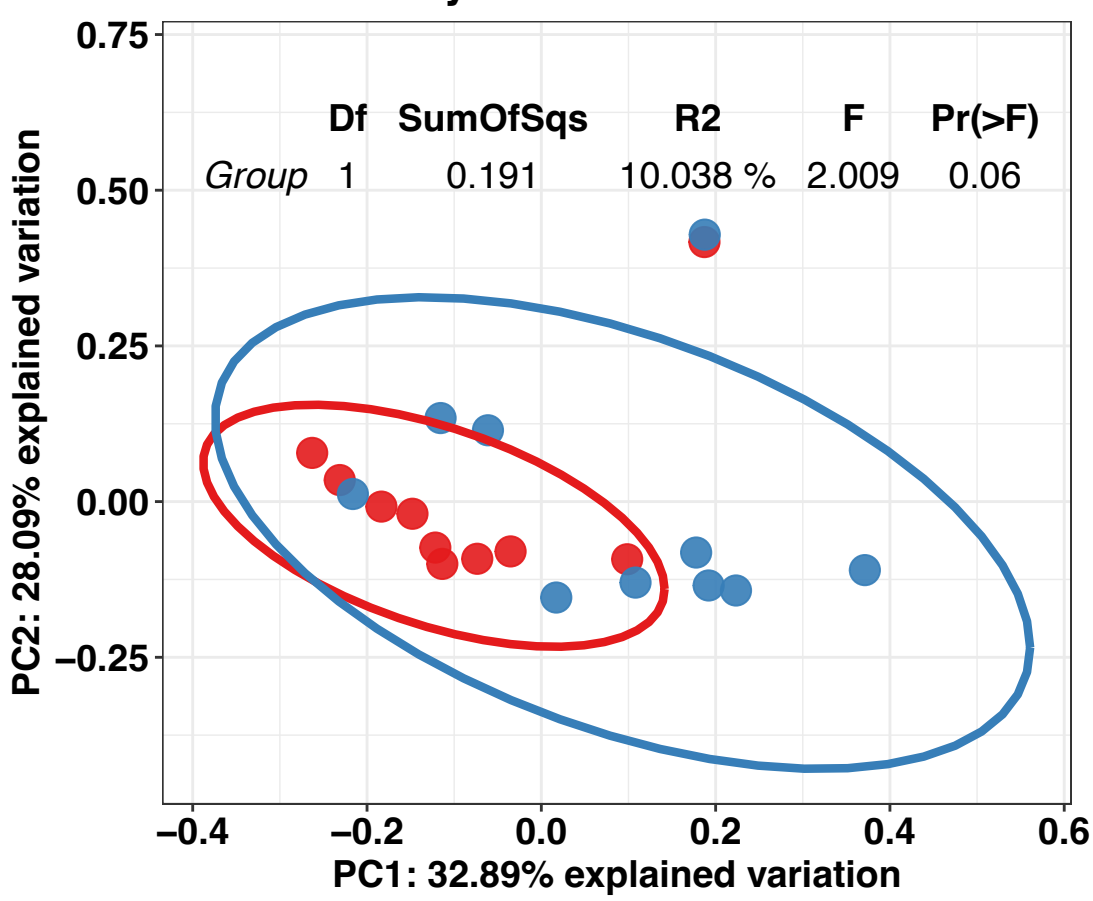**B****Baby-Stool Day 30**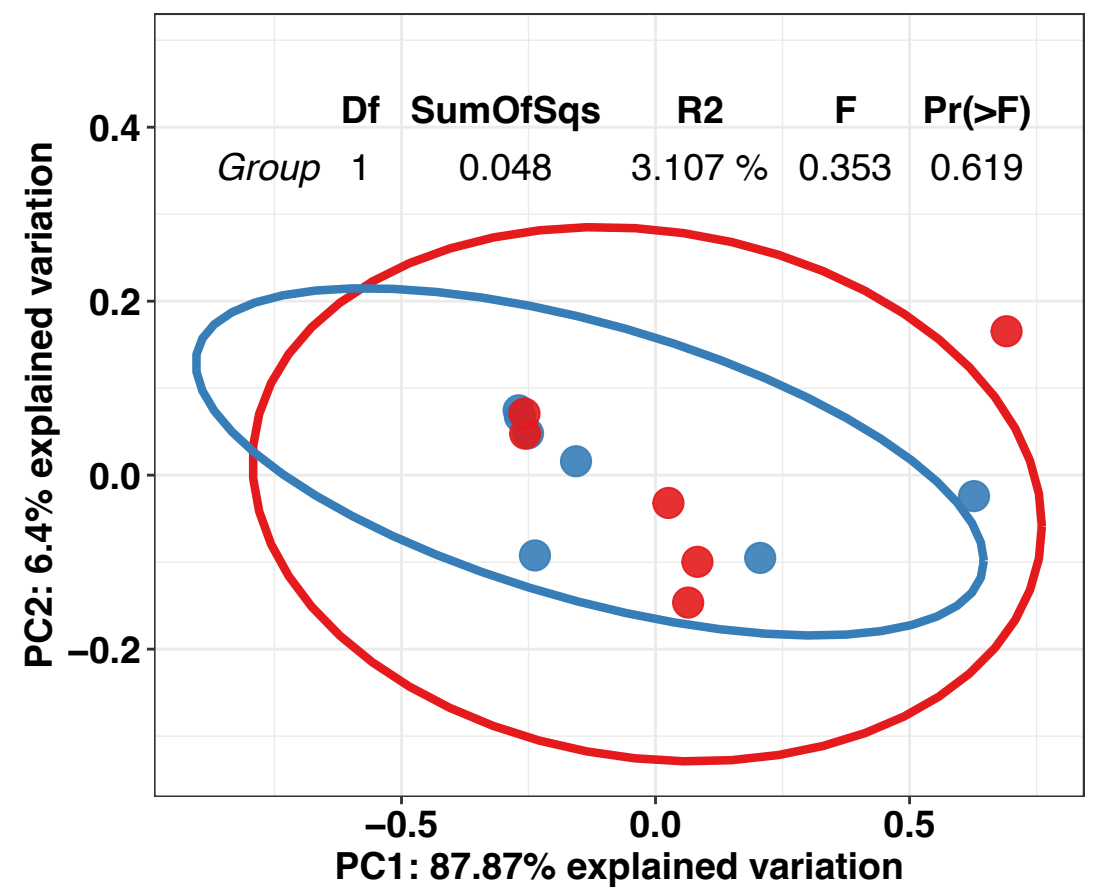**C****Baby-Forearm Day 1**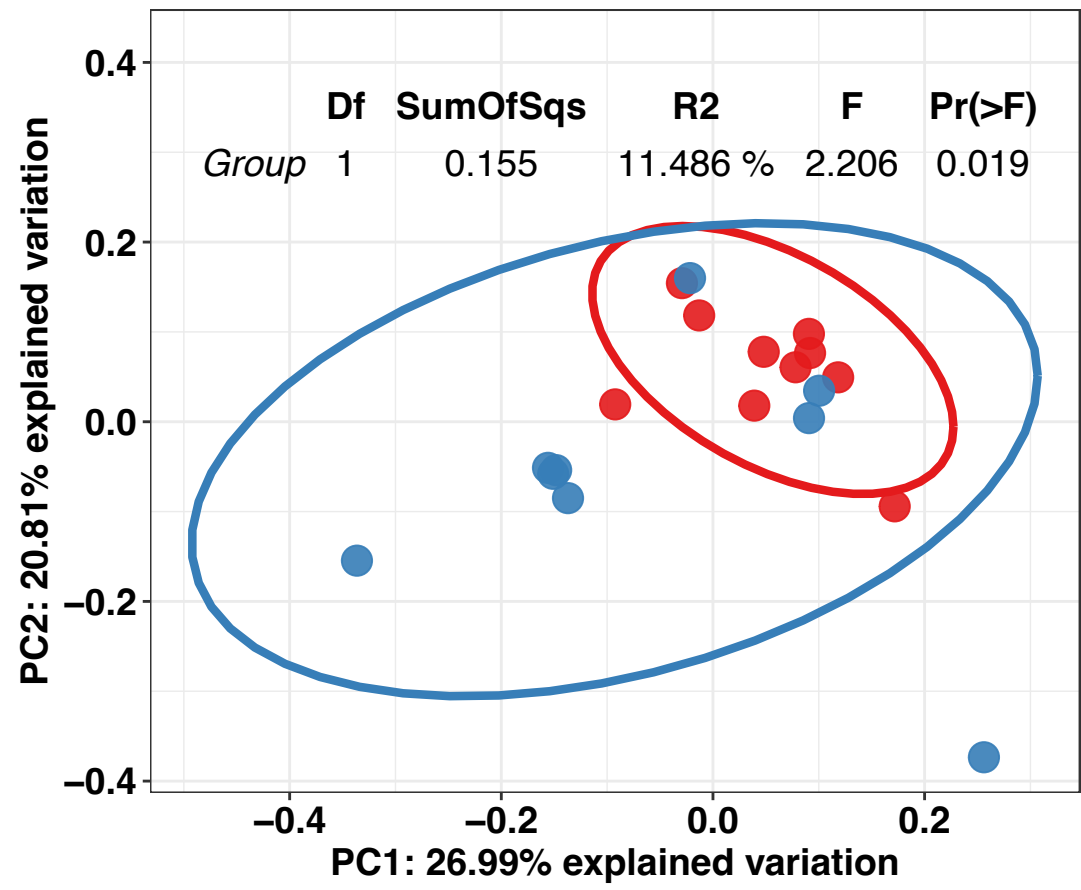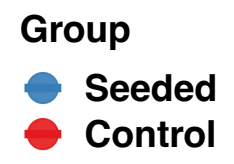

Supplement: mbio.00491-23-s0003.pdf [file mbio.00491-23-s0003.pdf]
